# Supplementary material for: Kinesiophobia and its correlations with pain, proprioception, and functional performance among individuals with chronic neck pain
Source: PubMed Central journal article supplement (PMC8266083; doi:10.1371/journal.pone.0254262), 2021-07-08
Supplement: pone.0254262.s003.pdf [file pone.0254262.s003.pdf]

## Tampa Scale for Kinesiophobia

1 = strongly disagree

2 = disagree

3 = agree

4 = strongly agree

|                                                                                                                                      |   |   |   |   |
|--------------------------------------------------------------------------------------------------------------------------------------|---|---|---|---|
| 1. I'm afraid that I might injury myself if I exercise                                                                               | 1 | 2 | 3 | 4 |
| 2. If I were to try to overcome it, my pain would increase                                                                           | 1 | 2 | 3 | 4 |
| 3. My body is telling me I have something dangerously wrong                                                                          | 1 | 2 | 3 | 4 |
| 4. My pain would probably be relieved if I were to exercise                                                                          | 1 | 2 | 3 | 4 |
| 5. People aren't taking my medical condition seriously enough                                                                        | 1 | 2 | 3 | 4 |
| 6. My accident has put my body at risk for the rest of my life                                                                       | 1 | 2 | 3 | 4 |
| 7. Pain always means I have injured my body                                                                                          | 1 | 2 | 3 | 4 |
| 8. Just because something aggravates my pain does not mean it is dangerous                                                           | 1 | 2 | 3 | 4 |
| 9. I am afraid that I might injure myself accidentally                                                                               | 1 | 2 | 3 | 4 |
| 10. Simply being careful that I do not make any unnecessary movements is the safest thing I can do to prevent my pain from worsening | 1 | 2 | 3 | 4 |
| 11. I wouldn't have this much pain if there weren't something potentially dangerous going on in my body                              | 1 | 2 | 3 | 4 |
| 12. Although my condition is painful, I would be better off if I were physically active                                              | 1 | 2 | 3 | 4 |
| 13. Pain lets me know when to stop exercising so that I don't injure myself                                                          | 1 | 2 | 3 | 4 |
| 14. It's really not safe for a person with a condition like mine to be physically active                                             | 1 | 2 | 3 | 4 |
| 15. I can't do all the things normal people do because it's too easy for me to get injured                                           | 1 | 2 | 3 | 4 |
| 16. Even though something is causing me a lot of pain, I don't think it's actually dangerous                                         | 1 | 2 | 3 | 4 |
| 17. No one should have to exercise when he/she is in pain                                                                            | 1 | 2 | 3 | 4 |

## Scoring Information Tampa Scale for Kinesiophobia

A total score is calculated after inversion of the individual scores of items 4, 8, 12 and 16.
