# Supplementary material for: Kinesiophobia and its correlations with pain, proprioception, and functional performance among individuals with chronic neck pain
Source: PLoS One. 2021 Jul 8;16(7):e0254262. doi: 10.1371/journal.pone.0254262 (PMC8266083; doi:10.1371/journal.pone.0254262)
Supplement: S2 Data — (XLSX) [file pone.0254262.s002.xlsx]

## Sheet: Sheet1
AGE RANGE	HEIGHT RANGE	WEIGHT RANGE	BMI RANGE	VAS	HAND_GRIP	NDI	TSK	THP_Flex	THP_Ext	THP_RL	THP_RR	height_meters	NDI_Percentage	SUM_0f_Errors	Mean_0f_Errors
30-40	163	65	24.4646	3.4	35	15	24	2	4	3	4	1.63	24	13	3.25
50-60	175	65	21.2245	4.1	30	20	31	6	6	6	5	1.75	30	23	5.75
30-40	175	72	23.5102	3.3	12	15	21	6	5	6	5	1.75	30	22	5.5
20-30	168	71	25.1559	5.2	18	25	41	5	7	5	6	1.68	32	23	5.75
20-30	169	60	21.0077	5.6	22	28	46	4	7	6	5	1.69	28	22	5.5
50-60	169	64	22.4082	6.2	13	29	51	4	8	6	5	1.69	24	23	5.75
50-60	157	67	27.1816	4.4	28	23	22	4	6	6	4	1.57	24	20	5
50-60	153	68	29.0487	5.2	26	22	18	4	7	6	5	1.53	24	22	5.5
50-60	151	70	30.7004	5.6	18	22	21	4	7	4	6	1.51	64	21	5.25
40-50	181	77	23.5036	5.5	18	23	41	4	7	4	6	1.81	36	21	5.25
30-40	145	67	31.8668	6.3	15	26	48	4	8	4	5	1.45	28	21	5.25
30-40	174	79	26.0933	7	5	29	45	6	9	5	6	1.74	28	26	6.5
40-50	188	87	24.6152	4.4	27	19	33	6	6	5	6	1.88	26	23	5.75
50-60	155	80	33.2986	3.2	35	15	23	5	7	5	6	1.55	24	23	5.75
50-60	169	54	18.9069	4.1	20	24	31	7	6	4	6	1.69	24	23	5.75
50-60	171	75	25.6489	4.2	20	24	32	4	6	5	6	1.71	22	21	5.25
50-60	178	83	26.1962	6.3	35	27	23	6	8	5	5	1.78	20	24	6
40-50	162	88	33.5315	4.3	20	21	33	5	6	6	6	1.62	24	23	5.75
20-30	153	91	38.8739	4.1	20	21	31	3	6	4	4	1.53	32	17	4.25
30-40	166	76	27.5802	4.3	20	22	33	5	9	3	3	1.66	24	20	5
30-40	183	81	24.187	3.6	38	18	26	3	7	3	3	1.83	24	16	4
30-40	180	92	28.3951	4.1	25	25	31	6	8	6	6	1.8	20	26	6.5
40-50	161	76	29.3199	4.6	25	24	36	5	6	5	5	1.61	24	21	5.25
40-50	188	87	24.6152	3.6	30	26	26	3	7	3	3	1.88	24	16	4
50-60	159	78	30.8532	5.2	30	24	45	8	6	8	8	1.59	62	30	7.5
20-30	153	91	38.8739	3.3	30	16	28	4	6	4	4	1.53	32	18	4.5
30-40	166	76	27.5802	4.2	20	19	32	7	9	7	7	1.66	24	30	7.5
30-40	183	81	24.187	4.2	20	17	32	3	7	3	3	1.83	24	16	4
30-40	180	92	28.3951	5.2	30	22	38	6	8	6	6	1.8	20	26	6.5
40-50	161	76	29.3199	4.4	20	22	36	5	6	5	5	1.61	24	21	5.25
40-50	188	87	24.6152	3.4	25	22	28	3	7	3	3	1.88	24	16	4
50-60	159	78	30.8532	5.3	25	22	42	8	6	8	8	1.59	62	30	7.5
30-40	163	65	24.4646	3.7	25	23	28	2	4	3	4	1.63	24	13	3.25
50-60	175	65	21.2245	4.1	20	15	31	6	6	6	5	1.75	30	23	5.75
30-40	175	72	23.5102	3.3	22	15	26	6	5	6	5	1.75	30	22	5.5
20-30	168	71	25.1559	5.2	12	16	45	5	7	5	6	1.68	32	23	5.75
20-30	169	60	21.0077	5.6	12	24	45	4	7	6	5	1.69	28	22	5.5
50-60	169	64	22.4082	6.2	9	25	49	4	8	6	5	1.69	24	23	5.75
50-60	157	67	27.1816	4.4	18	21	34	4	6	6	4	1.57	24	20	5
40-50	153	68	29.0487	5.2	8	21	45	4	7	6	5	1.53	24	22	5.5
50-60	151	70	30.7004	5.6	9	32	45	4	7	4	6	1.51	64	21	5.25
50-60	181	77	23.5036	5.5	9	18	43	4	7	4	6	1.81	36	21	5.25
40-50	145	67	31.8668	6.3	7	28	53	4	8	4	5	1.45	28	21	5.25
40-50	174	79	26.0933	7	9	29	56	6	9	5	6	1.74	28	26	6.5
40-50	188	87	24.6152	4.4	15	25	33	6	6	5	6	1.88	26	23	5.75
50-60	155	80	33.2986	3.2	27	18	29	5	7	5	6	1.55	24	23	5.75
50-60	169	54	18.9069	4.1	17	20	36	7	6	4	6	1.69	24	23	5.75
50-60	171	75	25.6489	4.2	17	22	36	4	6	5	6	1.71	22	21	5.25
40-50	178	83	26.1962	6.3	9	26	50	6	8	5	5	1.78	20	24	6
40-50	162	88	33.5315	4.3	17	25	38	5	6	6	6	1.62	24	23	5.75
30-40	153	91	38.8739	4.1	17	24	31	3	6	4	4	1.53	32	17	4.25
30-40	166	76	27.5802	4.3	17	24	31	5	9	3	3	1.66	24	20	5
30-40	183	81	24.187	3.6	23	25	26	3	7	3	3	1.83	24	16	4
30-40	180	92	28.3951	4.1	17	26	31	6	8	6	6	1.8	20	26	6.5
40-50	161	76	29.3199	4.6	17	23	36	5	6	5	5	1.61	24	21	5.25
40-50	188	87	24.6152	3.6	35	22	26	3	7	3	3	1.88	24	16	4
50-60	159	78	30.8532	5.2	17	31	21	8	6	8	8	1.59	62	30	7.5
20-30	153	91	38.8739	3.3	32	26	23	4	6	4	4	1.53	32	18	4.5
40-50	166	76	27.5802	4.2	27	26	32	7	9	7	7	1.66	24	30	7.5
30-40	183	81	24.187	4.2	27	19	32	3	7	3	3	1.83	24	16	4
30-40	180	92	28.3951	5.2	18	28	42	6	8	6	6	1.8	20	26	6.5
40-50	161	76	29.3199	4.4	27	26	34	5	6	5	5	1.61	24	21	5.25
40-50	188	87	24.6152	3.4	38	22	24	3	7	3	3	1.88	24	16	4
50-60	159	78	30.8532	5.3	19	31	43	8	6	8	8	1.59	62	30	7.5
